# Supplementary material for: Human-in-the-loop Bayesian optimization of wearable device parameters
Source: PLoS One. 2017 Sep 19;12(9):e0184054. doi: 10.1371/journal.pone.0184054 (PMC5604949; doi:10.1371/journal.pone.0184054)
Supplement: S1 File — (XLSX) [file pone.0184054.s001.xlsx]

## Sheet: READ_ME
Step frequency optimization - READ ME
Contact: Myunghee Kim (skyforme@gmail.com)
This file contains step frequency optimization results and subject characteristic
1) The first tab presents the subject characteristic.
2) The second tab contains data from the discrete search condition.
3) The third tab presents the step frequency and metabolic cost of the Gradient descent condition.
4) The fourth tab contains the step frequency and metabolic cost data from the Bayesian optimization condition.

## Sheet: Subject characteristic
Subject number	Age	Height (cm)	Weight (Kg)	Baseline SF (% difference from nominal SF)
1	37	180	70	0.9
2	27	168	57	-3.3
3	24	179	64	-0.5
4	29	174	81	6
5	29	160	57	-1.4
6	29	183	75.5	7.2
7	20	161	56	3
8	26	182	75	-3.4
9	23	172	57	-2.6

## Sheet: Discrete sweep
Subject		Trial number
number		1	2	3	4	5	6	7	8	9
1	Commanded	15	25	5	10	-15	-25	-10	-5	0
	Measured	15.1515	25.2525	5.0505	10.101	-15.1515	-25.2525	-10.101	-5.0505	0
	Metabolic cost	346.255	369.912	327.84	362.535	372.49	450.757	361.819	326.564	377.751
2	Commanded	25	-15	-25	-5	15	0	-10	10	5
	Measured	23.5135	-13.4234	-23.6937	-4.4144	15.4955	0.1802	-9.4595	10.0901	5.5856
	Metabolic cost	306.602	279.881	338.546	272.812	298.667	274.384	283.606	299.726	274.064
3	Commanded	10	15	-10	5	25	0	-25	-5	-15
	Measured	9.9115	14.6018	-10	5.3982	24.6018	-0.2655	-24.9558	-5.2212	-15.0442
	Metabolic cost	281.882	298.346	286.941	261.864	301.849	260.334	368.267	276.646	294.874
4	Commanded	10	-15	16	0	5	25	-5	-25	-10
	Measured	9.9476	-15.445	15.6021	1.8953	4.3979	24.0838	-4.6073	-24.5131	-9.9476
	Metabolic cost	339.111	370.696	382.525	382.402	342.398	423.921	392.781	485.639	377.832
5	Commanded	5	-10	10	15	0	-25	-15	-5	25
	Measured	5.2991	-10.2564	10.2564	14.6154	0.0855	-24.4615	-15.4017	-4.9573	24.8718
	Metabolic cost	212.701	266.26	237.323	257.878	231.153	441.279	277.756	209.092	229.905
6	Commanded	-5	-10	10	25	15	-25	0	5	-15
	Measured	-5.2679	-10.8929	10.1786	25	15.3571	-25.3571	0	5.3571	-14.6429
	Metabolic cost	352.387	298.703	264.117	324.919	331.896	365.828	288.776	293.919	321.192
7	Commanded	0	-15	-25	15	-10	25	-5	5	10
	Measured	-0.463	-12.963	-23.7963	14.1667	-9.0741	23.9815	-5.2778	5	9.4444
	Metabolic cost	330.929	373.65	413.324	372.677	356.436	374.096	324.798	320.837	298.74
8	Commanded	5	15	-5	-10	10	-25	-15	25	0
	Measured	4.5763	14.7458	-5.0847	-9.8305	10.1695	-25.1695	-14.9153	24.8305	-0.2542
	Metabolic cost	267.744	349.29	268.079	268.276	290.678	316.915	283.635	329.385	255.312
9	Commanded	-25	-15	10	25	5	0	-10	15	-5
	Measured	-24.7788	-15.0442	9.7345	24.4248	5.5752	-0.0885	-9.646	14.8673	-5.4867
	Metabolic cost	484.971	401.012	368.206	408.562	361.894	357.569	367.607	364.74	365.363

## Sheet: Gradient descent
	Step frequency parameter
	Number of iterations
Subject number	1	2	3	4	5	6	7	8	9	10	11	12	13	14	15
1	19.3879	16.5686	18.0983	20.8367	13.83	13.9603	10.0819	10.4004	10.5175	7.8623	8.3765	8.1922	7.6191	8.5959	6.3255
2	17.6696	15.9789	18.9777	18.5633	15.6375	13.5099	12.2145	13.5276	14.4205	11.7609	10.6557	10.2215	9.1121	8.1379	4.8413
3	-20.2812	-14.9849	-11.4444	-12.263	-10.6934	-10.314	-10.4906	-9.121	-9.7825	-9.8625	-10.8888	-10.6954	-10.6096	-11.8021	-11.6309
4	15.0146	12.2055	10.5699	9.418	7.3023	7.7675	8.7403	7.7953	6.5555	6.119	4.9366	6.5412	6.6565	7.4238	5.4315
5	19.6959	17.7596	15.7618	15.198	14.8883	14.3472	12.6839	12.4281	11.4265	12.0475	12.3526	11.6738	10.3688	9.9214	9.5271
6	-20.1382	-15.0422	-15.6362	-12.4702	-12.8116	-12.4876	-11.559	-11.0077	-11.0438	-10.7615	-11.4023	-11.2636	-11.347	-10.9253	-10.546
7	-19.4215	-12.0333	-9.8468	-7.5641	-5.383	-4.1578	-2.5537	-2.0827	-2.8222	-1.964	-2.317	-2.315	-3.1369	-1.9767	-1.5036
8	-20.6841	-14.2247	-12.3098	-10.5671	-10.8767	-11.5404	-10.1576	-8.7448	-9.2657	-8.6837	-8.4149	-9.6058	-9.6349	-9.9759	-9.8781
9	-20.3735	-11.0945	-6.0992	-5.5141	-2.5898	-2.5485	-2.4987	-2.9982	-3.9989	-3.3043	-2.6925	-2.4832	-2.7089	-3.2068	-2.9297
	Metabollic cost
	Number of iterations
Subject number	1	2	3	4	5	6	7	8	9	10	11	12	13	14	15
1	406.766	417.478	433.057	372.231	430.359	381.58	400.449	405.947	407.513	416.472	398.418	389.395	407.676	417.506	335.082
2	288.043	296.455	325.455	292.083	271.037	263.498	293.387	304.063	265.337	264.147	272.516	262.213	266.676	225.923	260.189
3	361.546	354.301	314.086	330.416	310.352	288.693	322.843	304.483	300.478	291.384	290.684	294.755	273.904	286.936	296.551
4	408.133	381.621	389.046	383.399	383.999	389.411	375.342	397.112	397.007	383.103	415.021	408.98	419.255	390.371	395.823
5	234.335	237.611	227.043	238.849	233.887	226.78	239.811	227.271	237.426	234.552	266.824	226.398	225.337	214.942	214.561
6	433.034	399.982	421.256	389.116	392.921	367.185	359.327	353.448	350.347	346.606	326.534	314.385	322.51	313.36	310.341
7	453.448	404.473	397.049	394.042	390.913	359.379	345.828	363.302	356.448	357.2	344.635	328.468	364.116	359.241	363.27
8	406.763	343.834	337.272	327.791	320.041	373.696	379.864	351.657	356.404	331.576	328.068	331.073	325.037	345.317	311.26
9	510.195	429.722	404.081	426.574	405.618	347.359	359.479	361.163	369.075	354.88	338.783	325.809	330.56	329.693	322.728

## Sheet: Bayesian optimization
	Step frequency parameter - Expected Improvement
	Iteration number
Subject number	1	2	3	4	5	6	7	8	9	10	11	12	13	14	15	16	17	18	19	20
1	-11.6547	8.0716	21.0193	3.692	-17.1497	8.7385	10.4727	-3.9424	-4.6719	-4.4985	-6.1479	-6.6589	-25.0425	-3.3371	-10.4761	0.018	-0.7189	-0.6348	-0.5688	0.235
2	-15.5781	-2.8271	23.0754	0.6297	-6.1199	-7.4226	-8.2537	-7.3678	-7.446	10.7666	13.5993	-24.3118	12.9517	-9.0028	-8.8972	-8.8491	10.9641	-8.2098	-8.4967	-8.1852
3	-20.3511	-4.2092	19.6302	-3.6042	-3.3936	0.3097	-6.1977	0.8249	1.1095	-0.0733	0.1085	4.9816	4.1735	2.785	2.1389	1.9615	1.6656	2.188	2.1027	2.1294
4	-24.8923	-4.471	10.0212	24.7776	10.2588	12.4563	12.893	9.2998	9.4518	9.1692	9.4286	9.5527	9.5978	9.6998	10.4307	9.4284	9.9499	10.2073	10.2987	10.0929
5	-15.9783	-7.4825	21.4001	-5.4163	-2.6617	1.7123	-2.0978	-1.4636	-0.0151	-0.0769	-0.8743	0.5161	-25.3876	-8.2508	9.6064	-4.0728	-3.2579	-3.769	13.4795	-3.5991
6	23.0074	-7.7782	-9.7754	-24.6746	14.7043	17.7703	16.9422	16.879	6.7074	7.4903	7.0945	7.609	7.0072	7.1749	6.3368	6.2646	5.6883	5.2078	5.2078	5.1819
7	18.0119	-2.5392	-10.1584	-0.725	1.0911	1.8785	1.8085	-24.6486	-3.2447	2.4131	0.8382	0.4452	1.5757	-0.3598	-0.1469	-0.9867	0.2582	-0.1416	-0.136	0.0664
8	11.5823	-56.4574	-23.9977	25.3634	-24.12	2.6752	4.4815	4.4615	5.3271	4.893	4.7169	5.0357	5.0278	5.15	5.6347	5.6829	6.2975	6.0064	-13.1801	-14.3771
9	20.8325	5.217	-21.7574	6.6862	0.2091	6.4233	7.8548	7.8488	8.537	8.2536	6.8579	7.6235	7.1689	7.2765	7.5831	7.3846	8.0744	7.1075	8.0135	7.6571
	Instantaneous cost (metabolic cost)
	Bayesian optimization
Subject number	1	2	3	4	5	6	7	8	9	10	11	12	13	14	15	16	17	18	19	20
1	372.63	371.523	391.255	375.897	375.111	366.245	387.111	370.652	362.264	378.295	356.484	383.985	414.222	395.518	381.778	364.671	366.818	375.674	336.662	363.224
2	300.83	292.884	309.948	298.235	273.096	273.726	279.853	257.354	275.687	272.381	271.43	357.75	287.305	280.232	278.329	294.116	290.547	271.503	258.747	283.38
3	334.767	303.531	313.317	280.979	287.858	298.544	300.671	287.257	296.837	286.157	264.45	285.777	288.949	295.928	279.435	280.981	285.727	292.182	276.167	289.615
4	503.029	432.816	393.959	428.545	367.718	370.126	391.25	366.917	389.705	382.188	388.437	391.82	389.452	392.502	384.322	396.674	386.841	384.731	380.769	388.552
5	269.9	252.783	272.695	245.684	234.818	243.878	243.215	250.892	242.314	245.261	283.04	291.813	396.512	285.051	249.67	256.15	240.706	241.743	252.617	245.648
6	291.057	291.14	287.403	336.056	288.926	274.54	270.365	259.716	272.747	269.242	263.055	262.424	265.829	252.036	259.315	241.763	241.073	266.056	257.651	244.567
7	363.714	324.625	372.313	338.776	341.582	337.48	336.652	444.568	351.735	345.902	337.428	331.383	341.53	340.285	329.285	345.543	336.474	327.832	337.991	335.643
8	310.787	295.43	315.726	397.45	309.126	295.499	273.308	277.836	285.985	289.796	281.915	276.308	285.294	270.399	278.912	267.787	277.491	291.679	277.961	277.221
9	380.082	355.594	460.856	367.129	367.855	343.254	345.549	351.601	361.567	366.761	329.476	336.27	340.32	341.825	348.274	354.228	345.813	346.737	343.533	340.235
